# Supplementary material for: RADAR: differential analysis of MeRIP-seq data with a random effect model
Source: PubMed Central journal article supplement (PMC6927177; doi:10.1186/s13059-019-1915-9), 2019-12-23
Supplement: 13059_2019_1915_MOESM1_ESM.pdf [file 13059_2019_1915_MOESM1_ESM.pdf]

**Additional file 1**

# **RADAR: Differential analysis of MeRIP-seq data with a random effect model**

Zijie Zhang<sup>2,3</sup>, Qi Zhan<sup>1</sup>, Mark Eckert<sup>4</sup>, Allen Zhu<sup>2,3</sup>, Agnieszka Chryplewicz<sup>4</sup>, Dario F De Jesus<sup>5</sup>,

Decheng Ren<sup>6</sup>, Rohit N Kulkarni<sup>5</sup>, Ernst Lengyel<sup>4</sup>, Chuan He<sup>2,3</sup>, Mengjie Chen<sup>1</sup>.

<sup>1</sup>Section of Genetic Medicine, Department of Medicine, Department of Human Genetics, The University of Chicago, Chicago, IL 60637, USA;

<sup>2</sup>Department of Chemistry, Department of Biochemistry and Molecular Biology, and Institute for Biophysical Dynamics, The University of Chicago, Chicago, IL 60637, USA;

<sup>3</sup>Howard Hughes Medical Institute, The University of Chicago, Chicago, IL 60637, USA;

<sup>4</sup>Department of Obstetrics & Gynecology, Section of Gynecologic Oncology, The University of Chicago, Chicago, IL 60637, USA;

<sup>5</sup>Section of Islet Cell and Regenerative Biology, Joslin Diabetes Center and Harvard Medical School, Boston, MA 02215 USA;

<sup>6</sup> Section of Endocrinology, Diabetes & Metabolism, Department of Medicine, The University of Chicago, Chicago, IL 60637 USA.

Correspondence to: [mengjiechen@uchicago.edu](mailto:mengjiechen@uchicago.edu) & [chuanhe@uchicago.edu](mailto:chuanhe@uchicago.edu)

Fig. S1

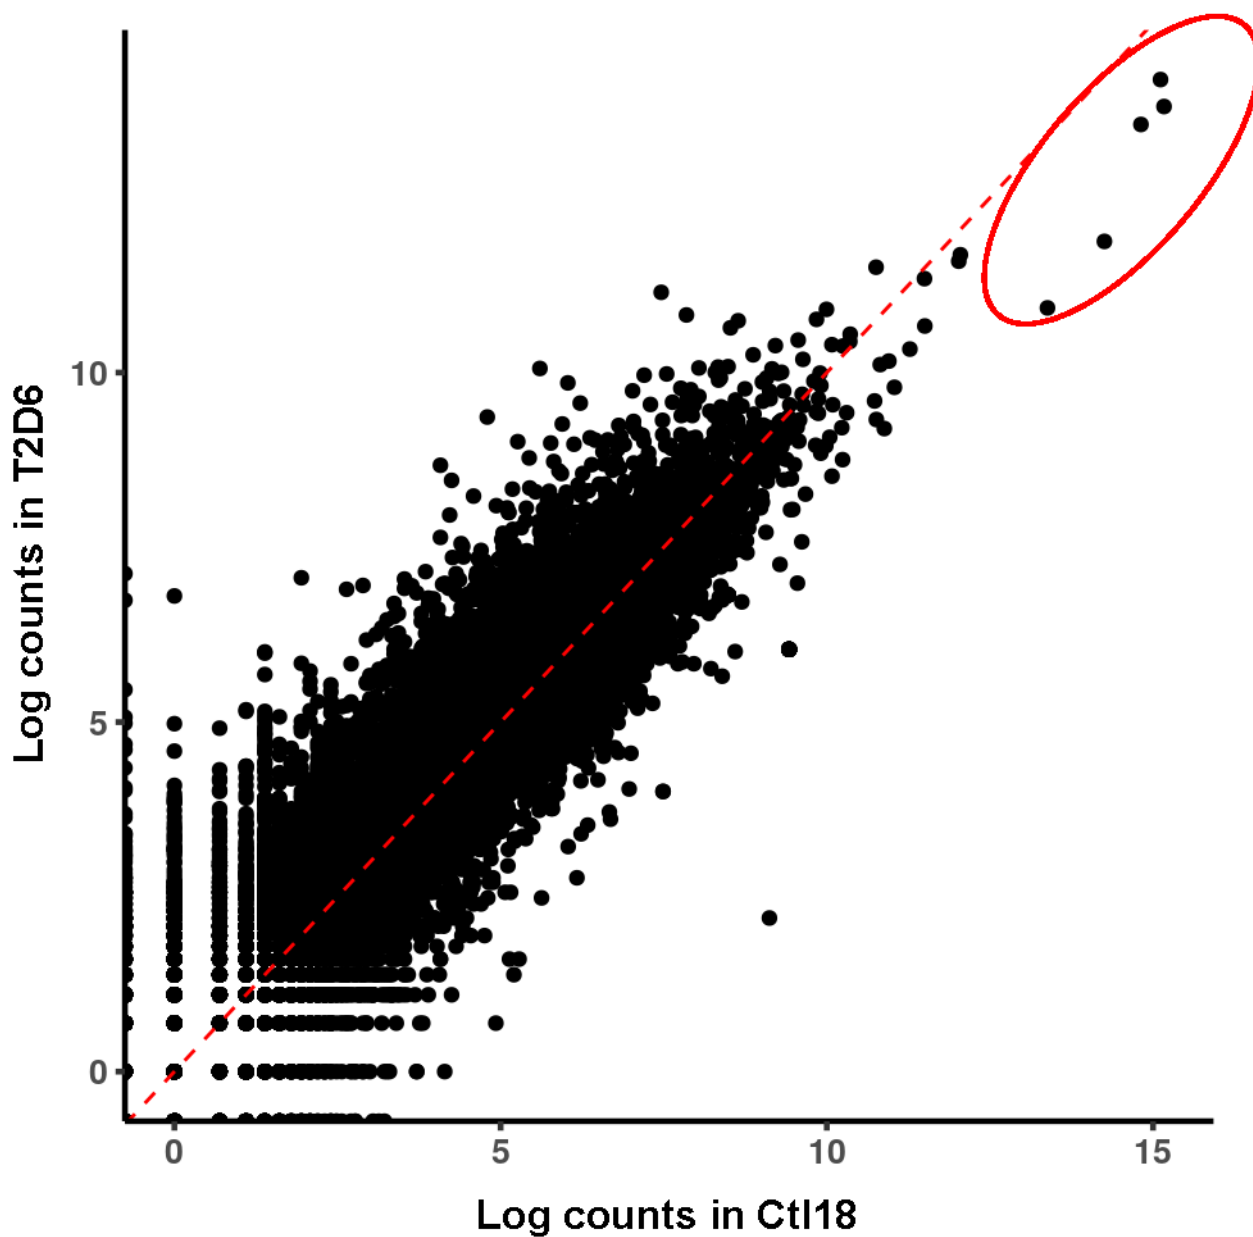

**Fig. S1. Scatter plot of read count.** The input library log read counts of a sample from one experimental group are plotted against a sample from another experimental group. Shown is an example scenario where highly expressed genes can result in underestimation of other genes when normalizing by total coverage. The highly expressed genes that can strongly influence the scaling factor estimation are highlighted by red circles.

Fig. S2

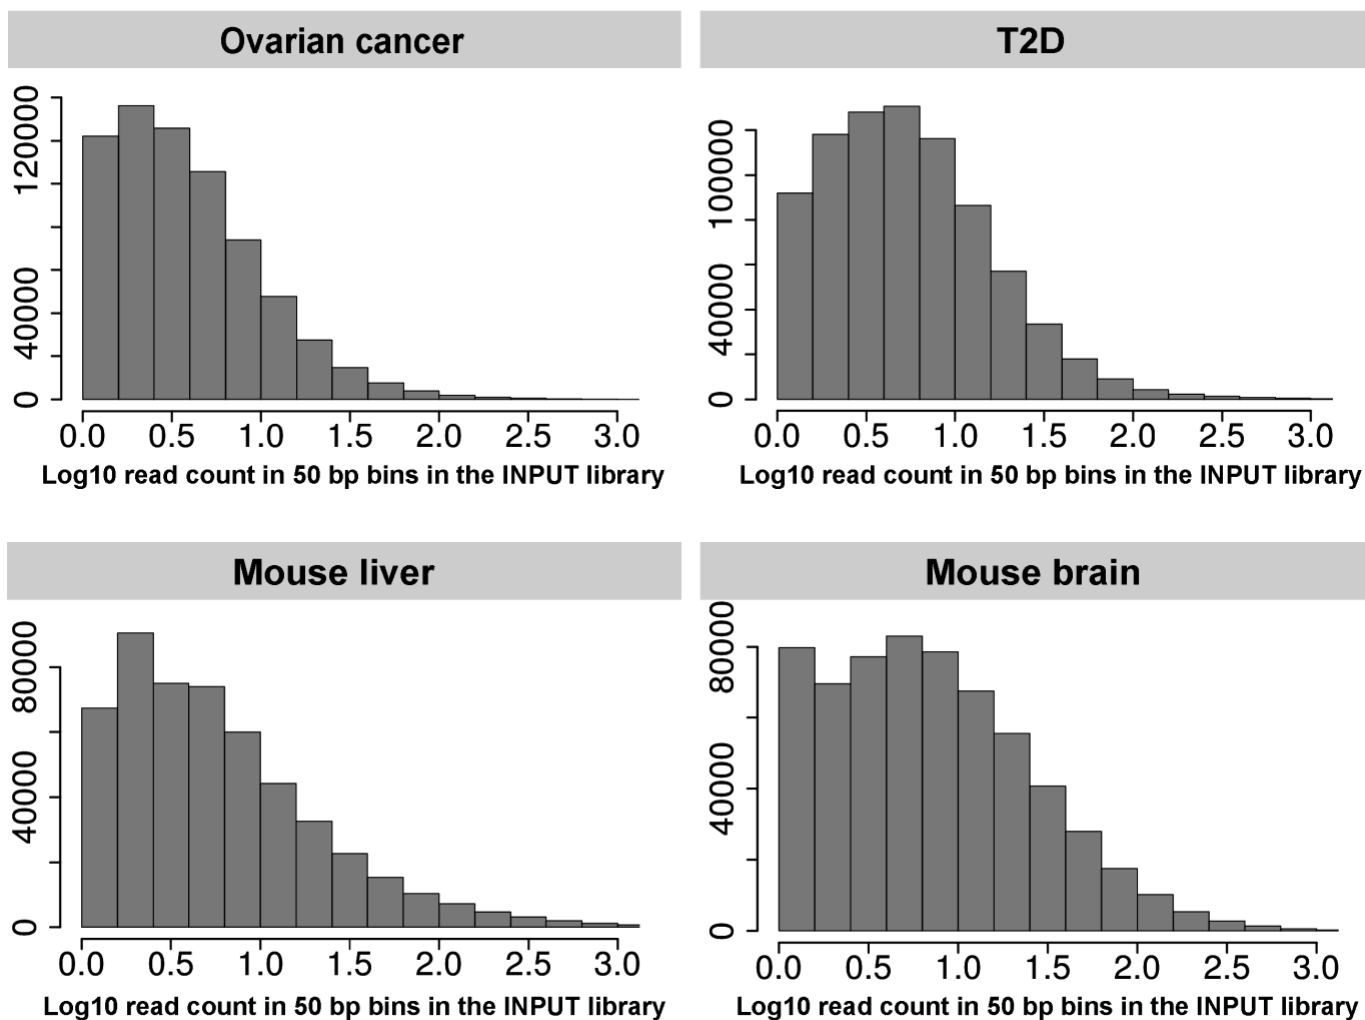

**Fig. S2. Read count distribution of INPUT data.** Distribution of read count  $c_i$  (Fig. 1A) in a 50bp bin of input library from real m<sup>6</sup>A-seq datasets. The read count is shown in log<sub>10</sub> scale.

Fig. S3

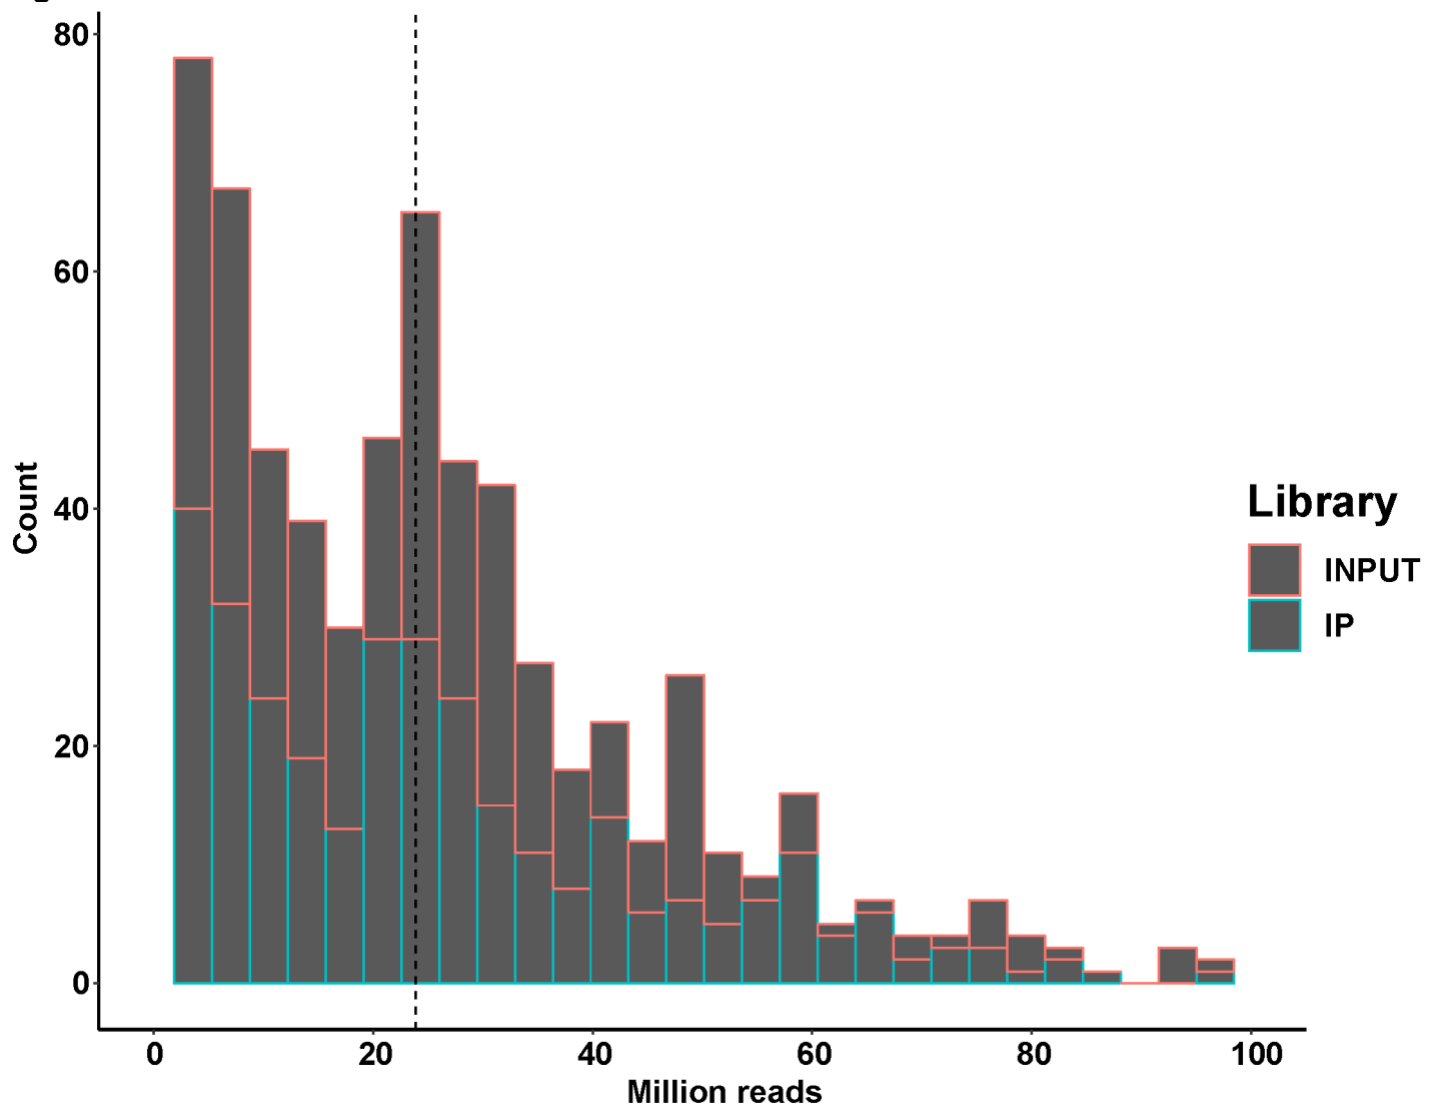

**Fig. S3. Sequencing depth distribution of m<sub>6</sub>A-seq in published literatures.** Distribution of sequencing depth (million reads) drawn from a m<sub>6</sub>A-seq database (unpublished observations) is shown by histogram. The database included 339 datasets from published literatures.

Fig. S4

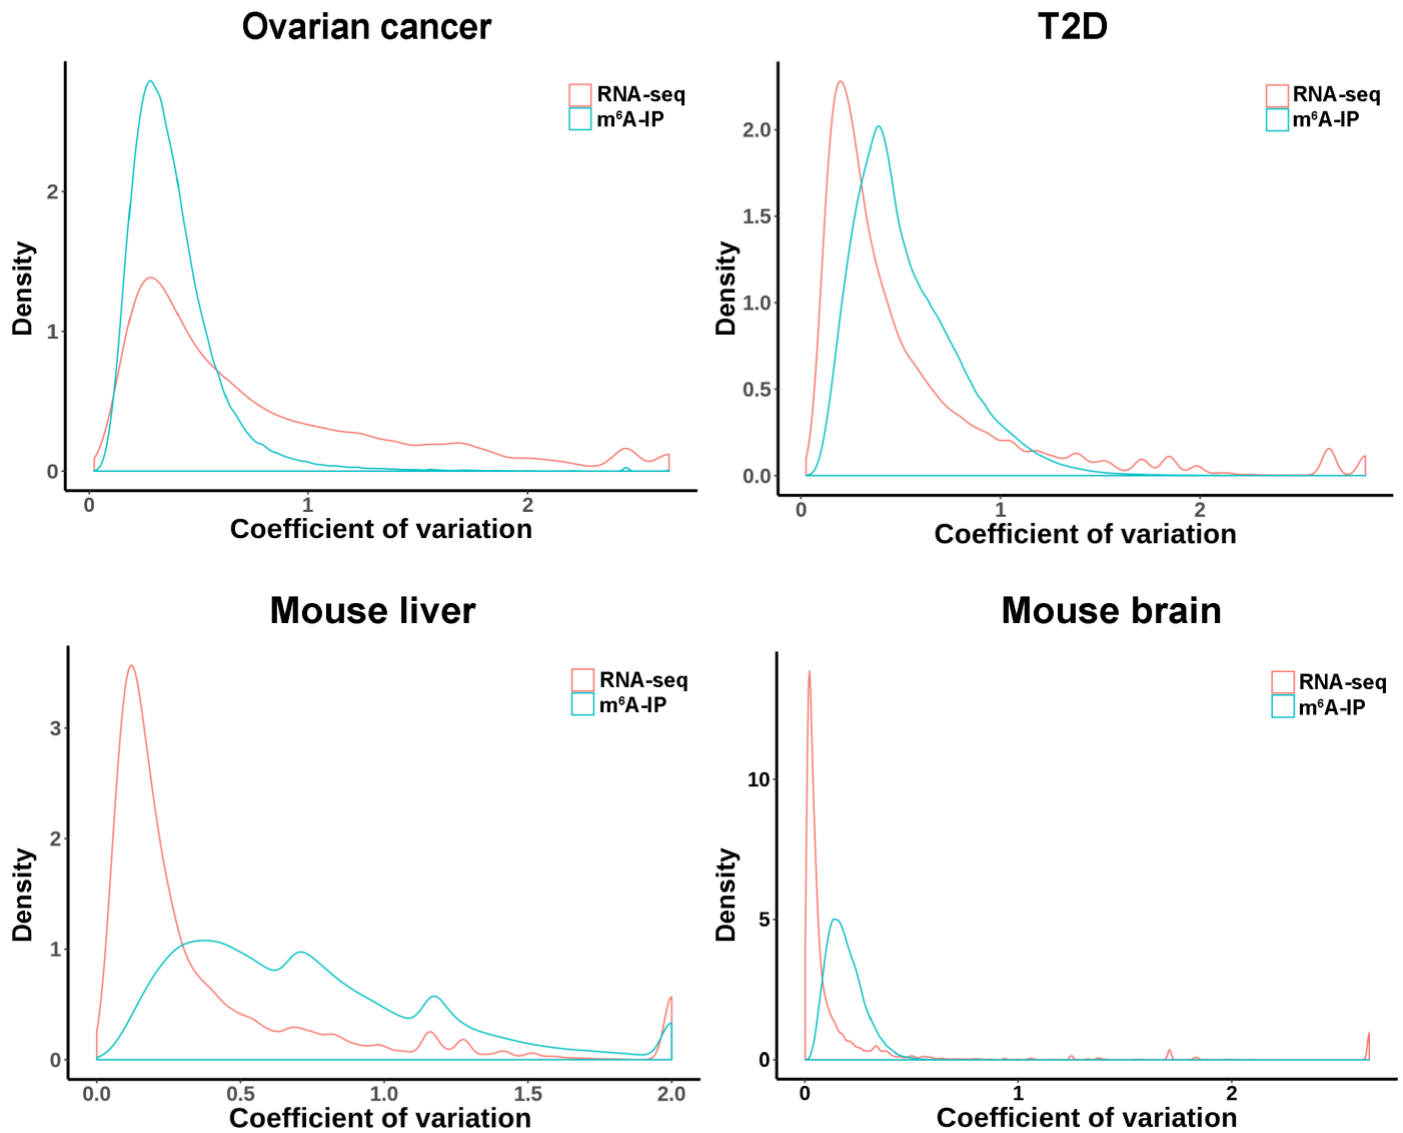

**Fig. S4. Variability distribution comparing RNA-seq and m<sup>6</sup>A-seq (MeRIP-seq).** Density plot comparing variabilities of m<sup>6</sup>A-seq data with RNA-seq data. Variability is represented by coefficient of variation.

Fig. S5

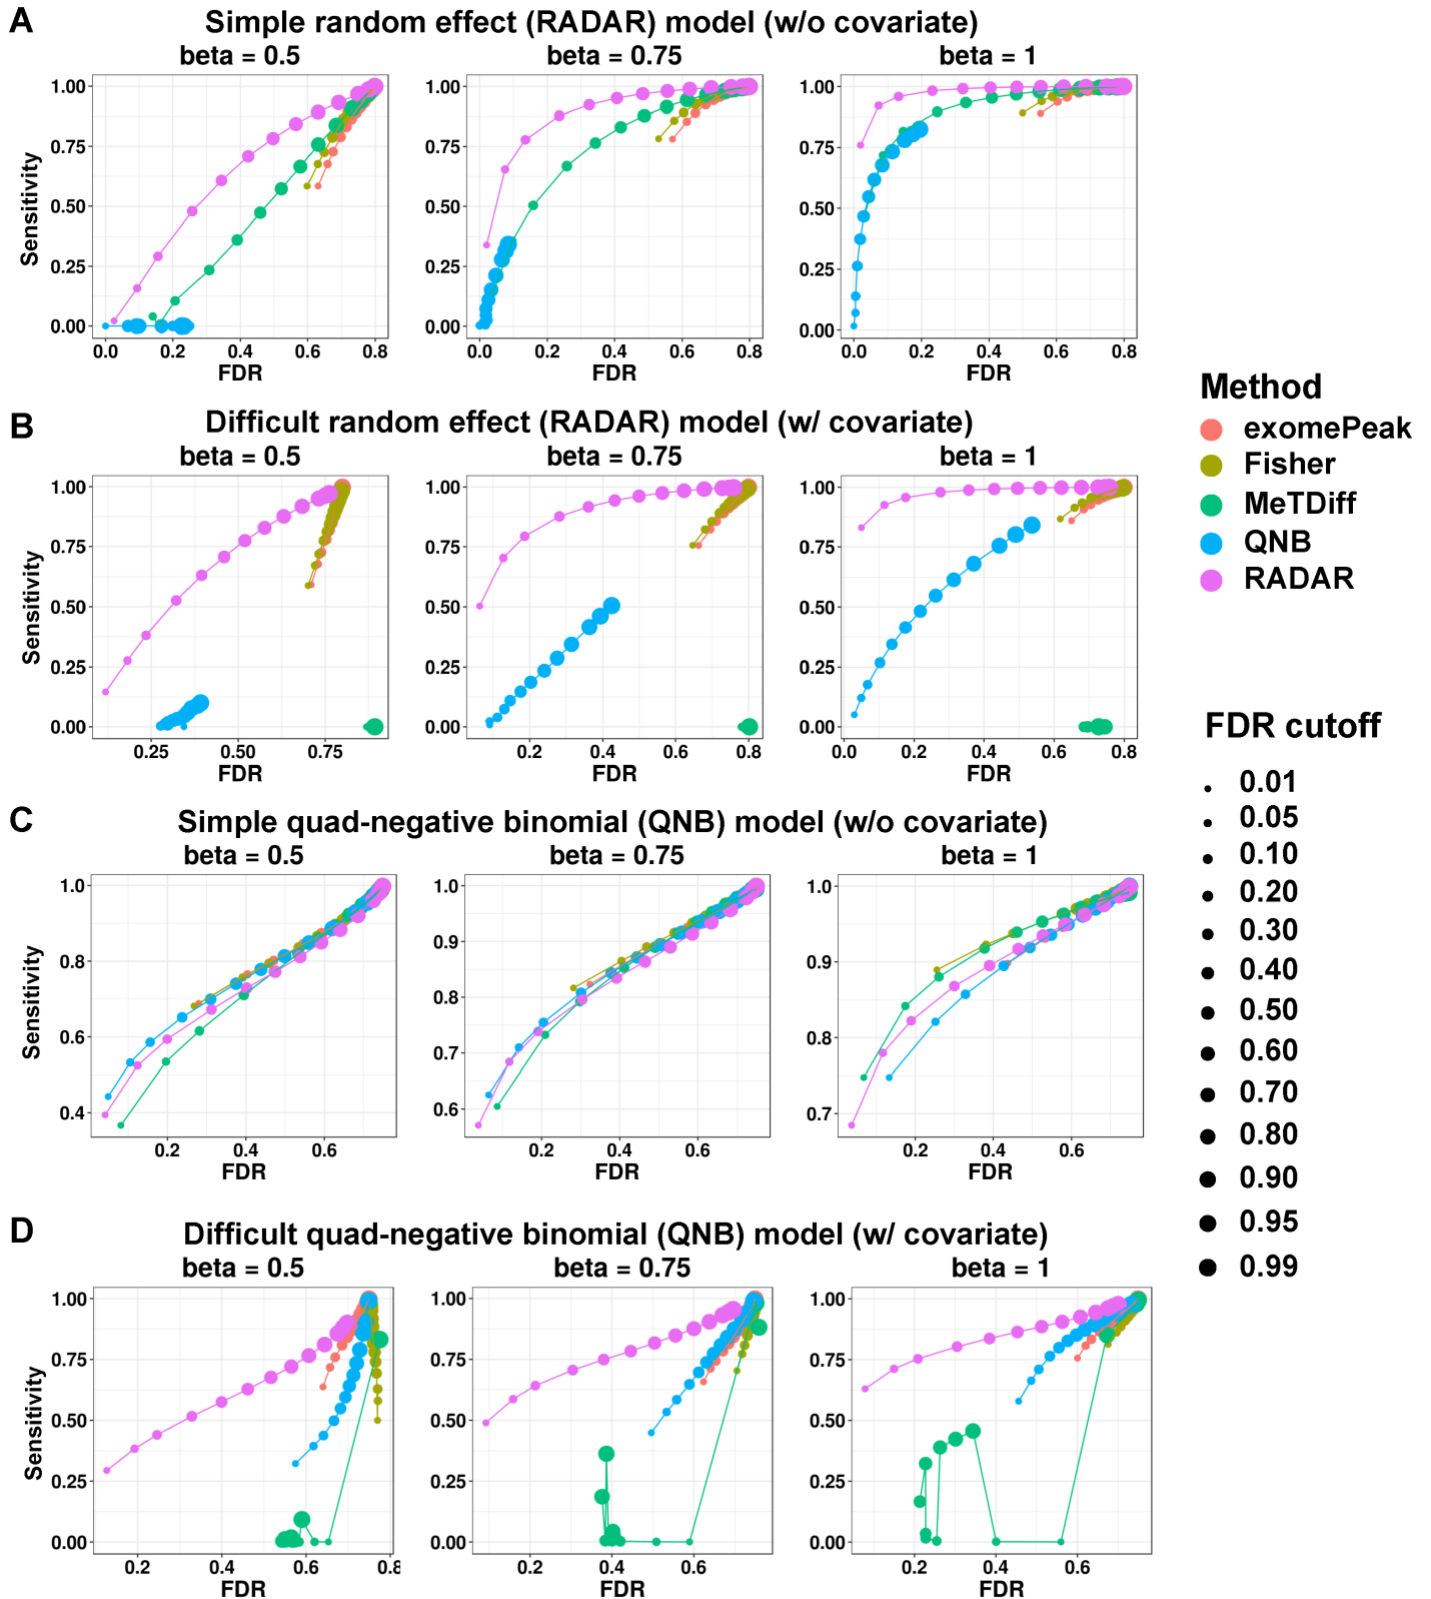

**Fig. S5. Evaluating performances of benchmarked methods on simulated data using sliding thresholds.** We evaluated the performance of RADAR and other methods by comparing the sensitivity and empirical FDR obtained by varying FDR threshold for selecting DM sites. The threshold of selecting DM sites are labeled by the size of data points.

Fig. S6

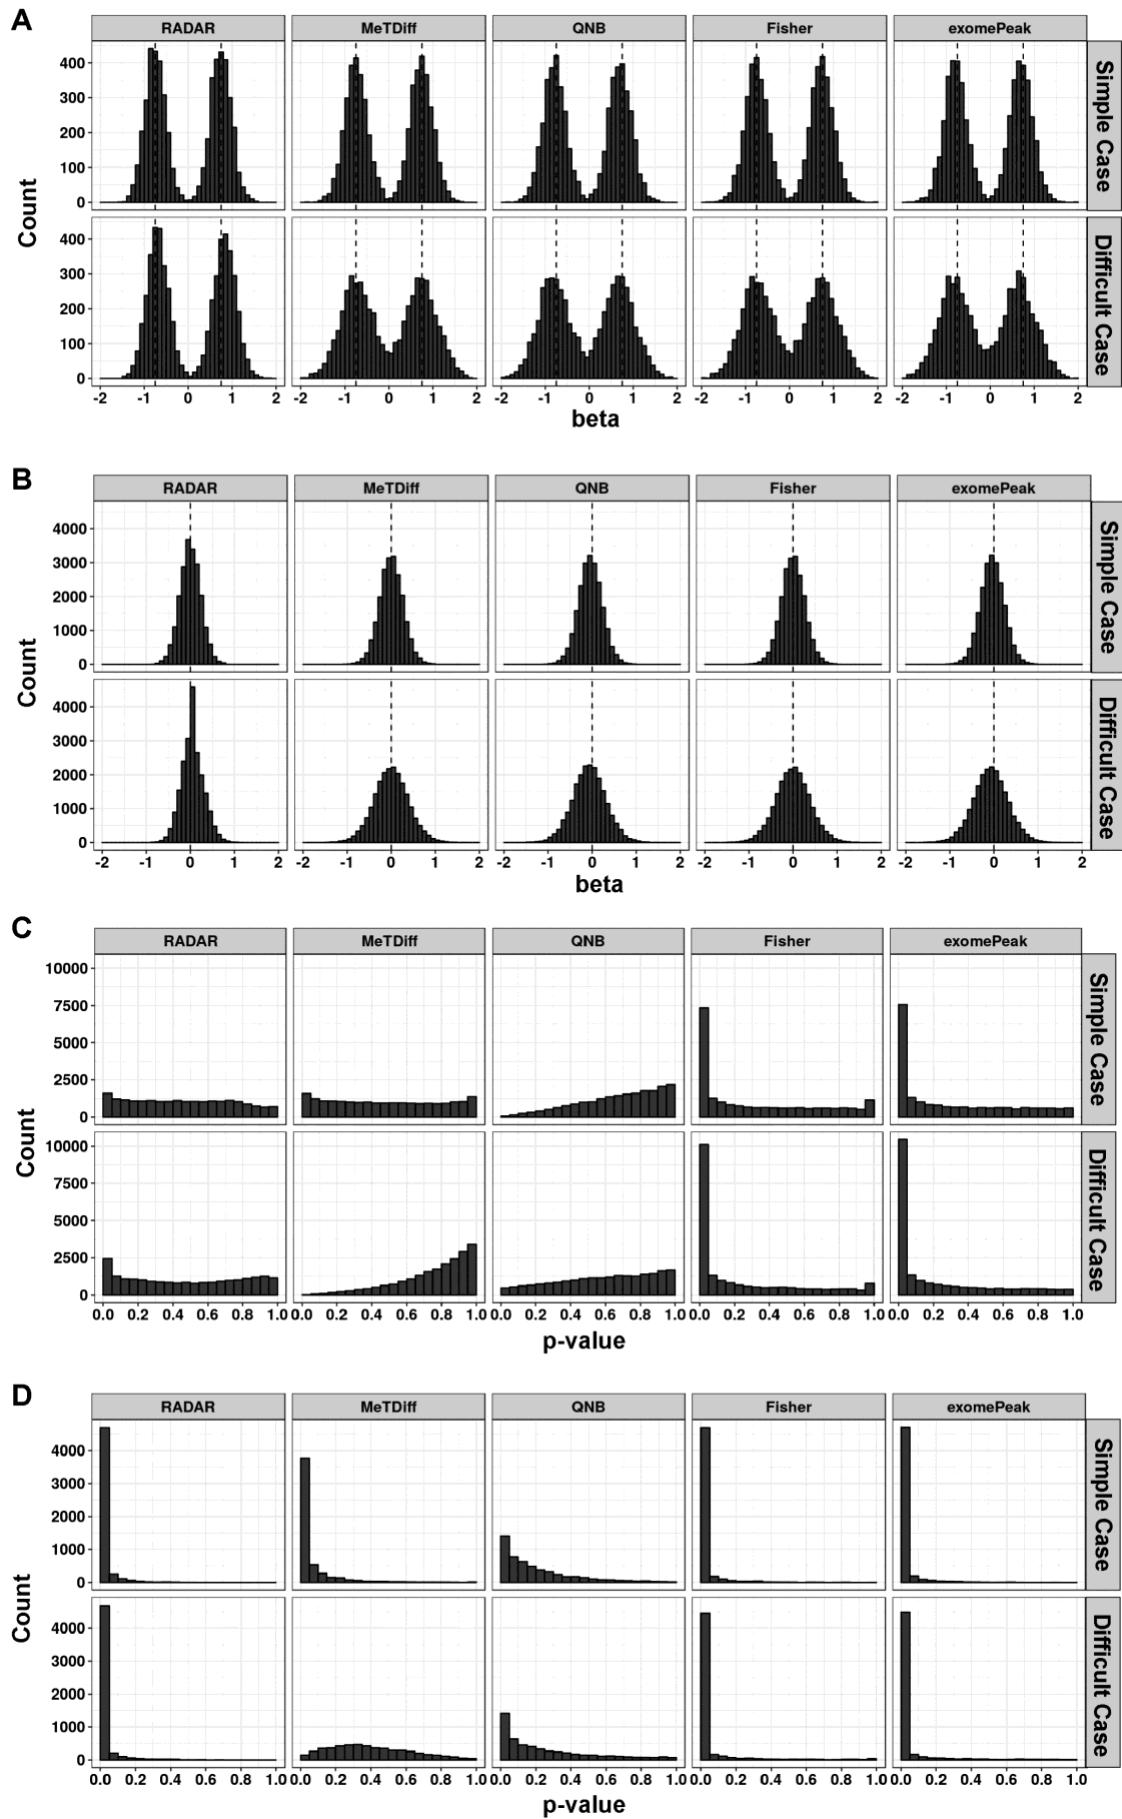

## Fig. S6 – continued

**Fig. S6. P-value and effect size estimates on simulated data.** Using data simulated by random effect model of effect size = 0.75, we evaluated the precision of effect size and p-value estimates. (a) shows the distribution of effect size estimates in true differential sites and (b) shows the distribution of effect size estimates in Null sites where the true effect size is labeled by dashed line. (c) shows p-values distribution for Null sites where p-values are expected to be uniformly distributed. (d) shows p-values distribution for true differential sites where p-values are expected to be distributed near zero. In all panels, “simple case” refers to simulated data without covariates while “difficult case” refers to simulated data with a covariate.





Fig. S8

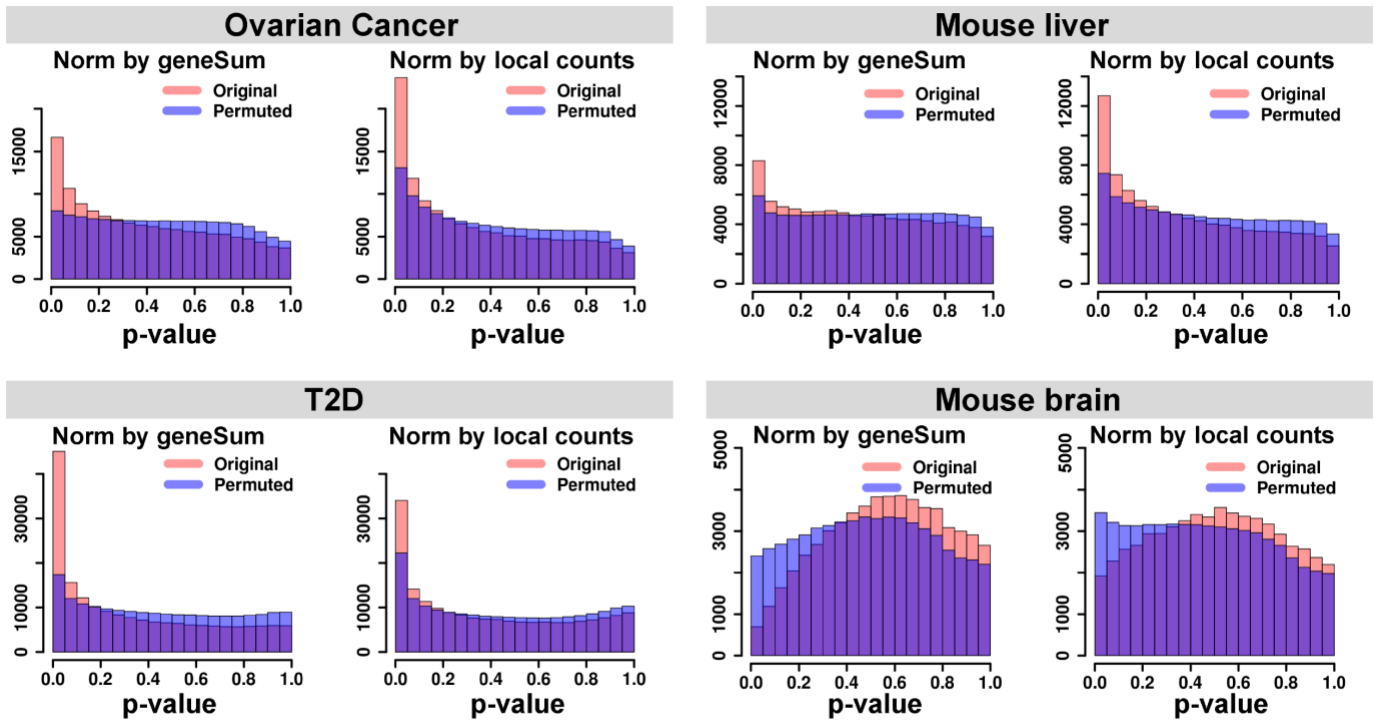

**Fig. S8. Compare the methods to adjust for gene expression level.** Local peak/bin read counts or gene level read counts of INPUT library can be used to account for pre-IP gene expression level variation. We compared the performance of two strategies to adjust for gene expression variation and showed the histogram of p-values from original tests and permutation tests.

Fig. S9

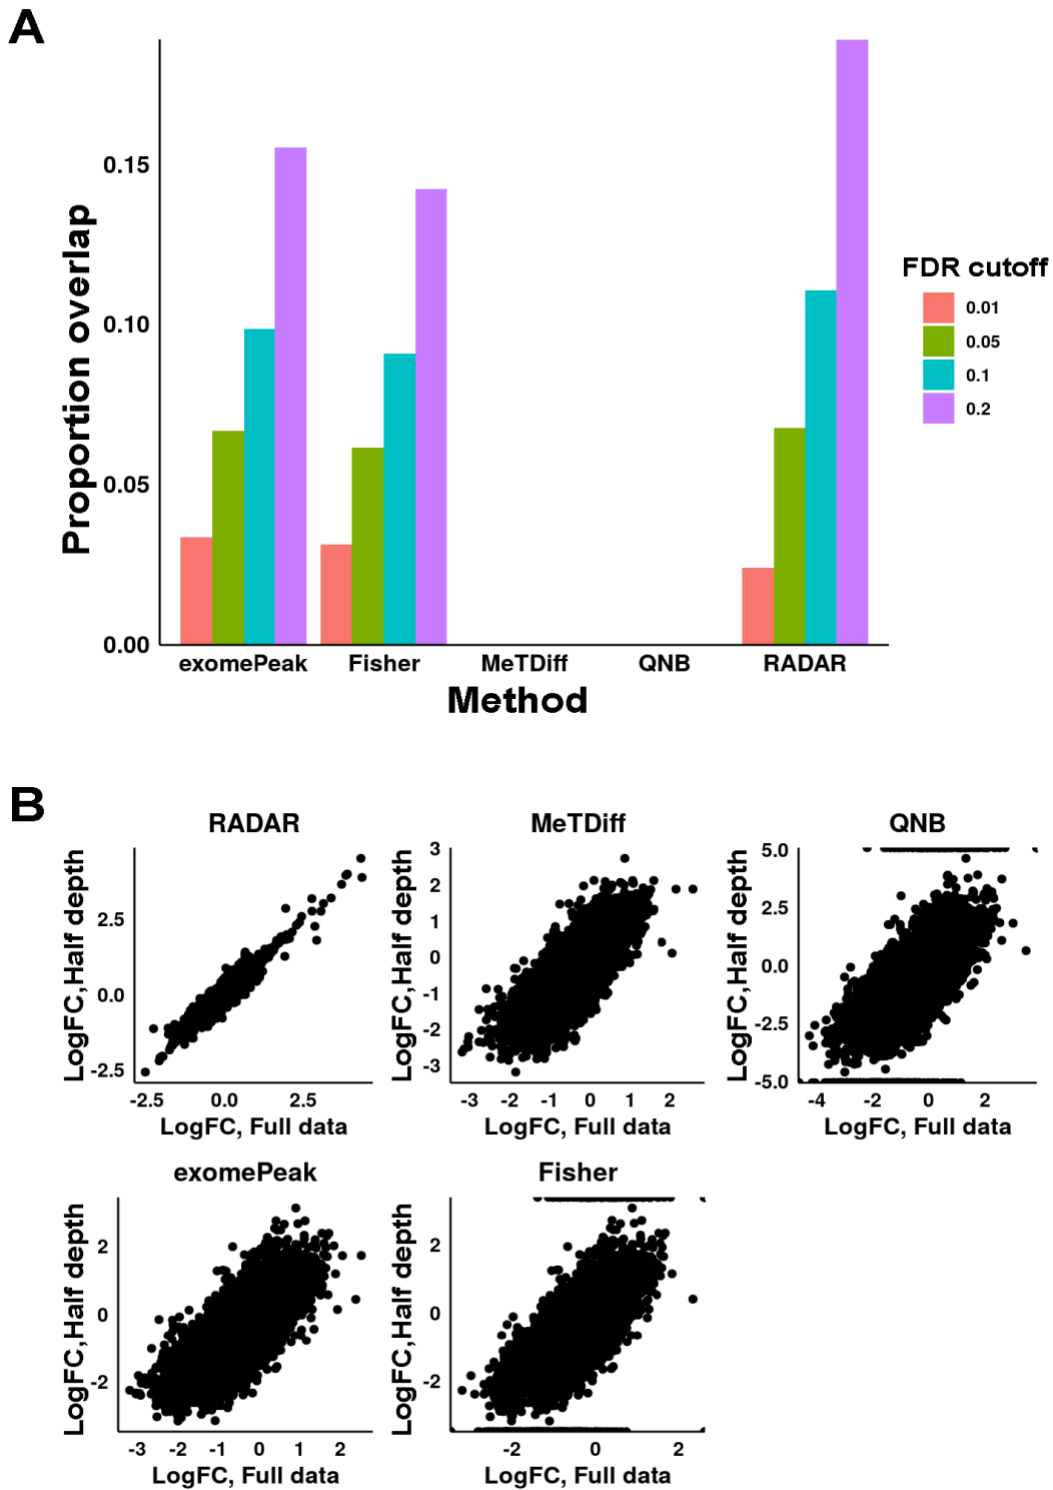

**Fig. S9. Compare results obtained from shallower sequence depth with that from original depth.** We sub-sampled sequence reads from INPUT libraries of the T2D dataset to obtain a dataset of shallower sequence depth (half of the original data). We applied the benchmarked methods to the sub-sampled data and compared the result with the result obtained from the original data. We show the proportion of sites positively identified in both datasets in (a) and plotted the estimated log fold changes against each other in (b).

Fig. S10

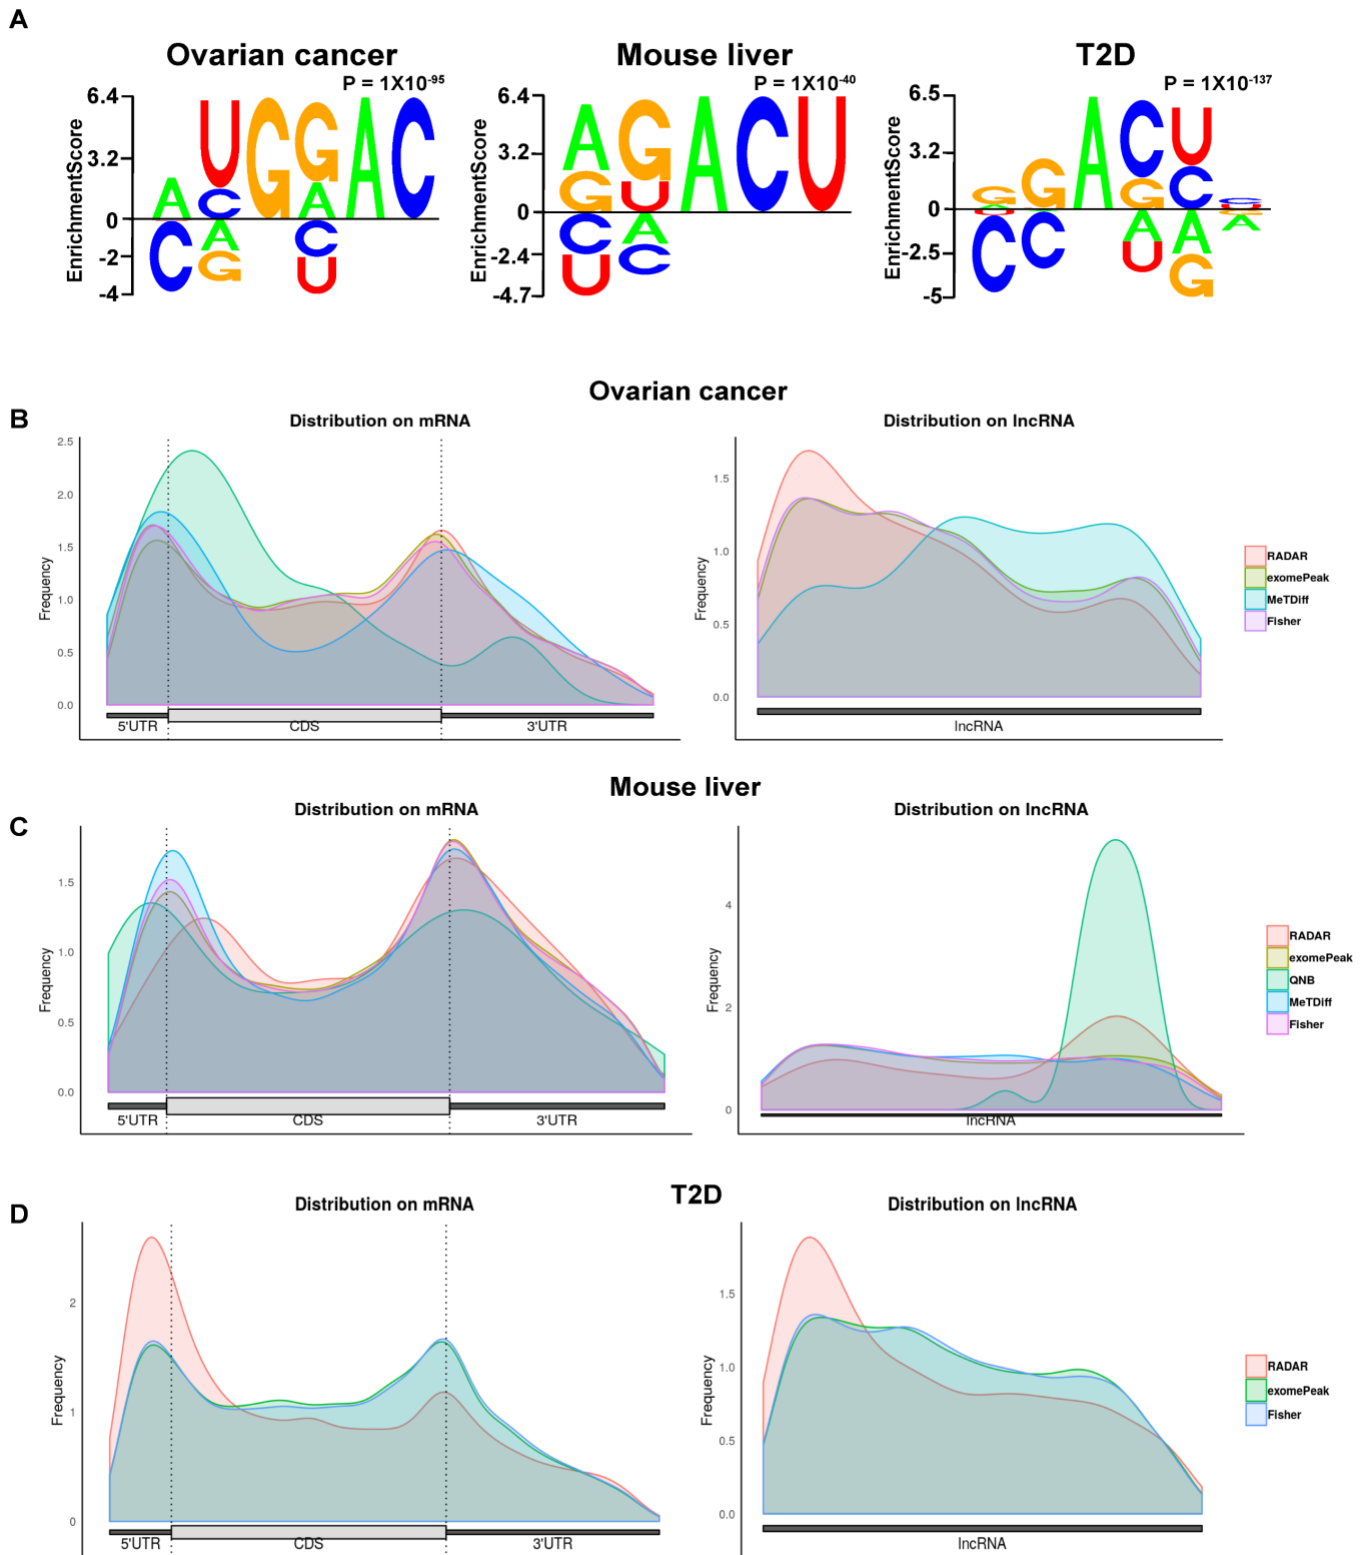

**Fig. S10. Motif analysis and topological distribution of putative DM sites.** We performed de-novo motif search analysis using Homer2 on the putative DM sites detected by RADAR on ovarian cancer, mouse liver and T2D datasets. (a) shows RADAR-detected DM sites were enriched for known m6A consensus motif—RRACU. (b) shows metagene plots of putative DM sites detected by different methods (method that detected too few DM sites in given dataset were not shown).

Fig. S11

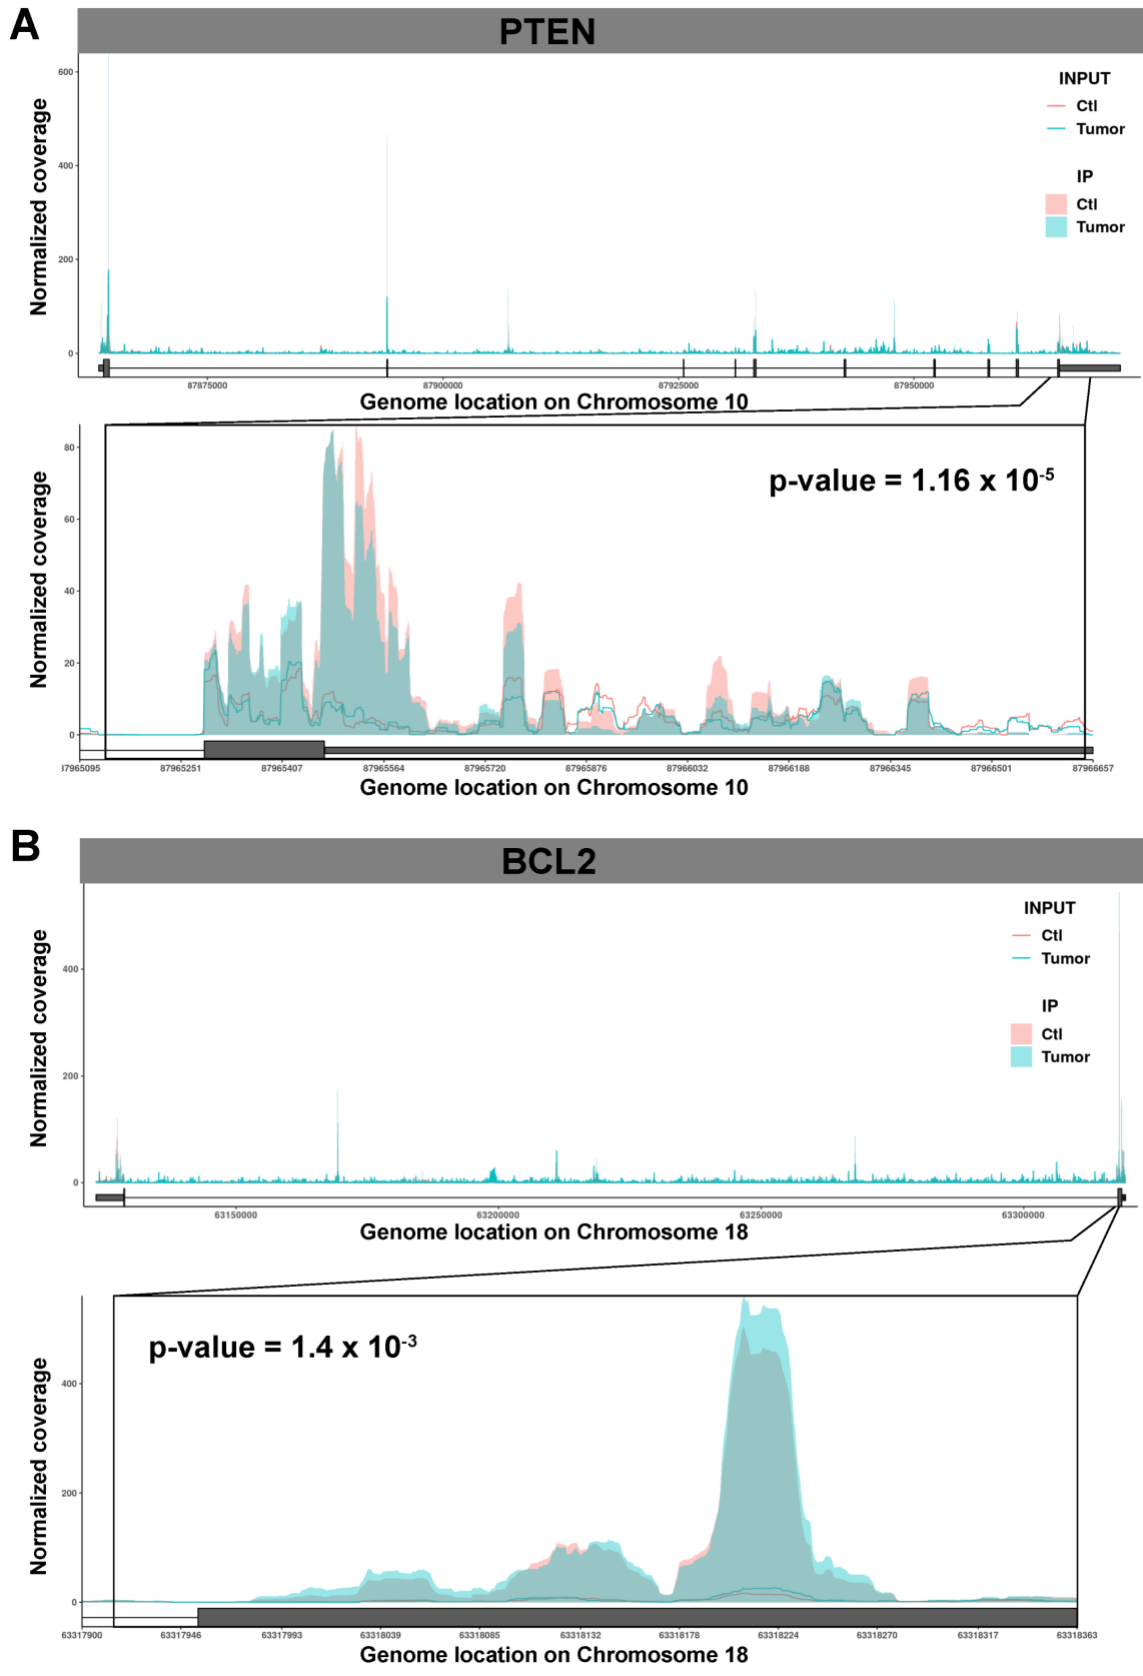

**Fig. S11. Coverage plot to visualize differential m<sub>6</sub>A peaks in ovarian cancer.** Average coverage of each group is plotted for (a) PTEN and (b) BCL2. The coverages of both INPUT and IP are normalized by the expression level of target gene so that the coverages of IP samples are directly comparable.

Fig. S12

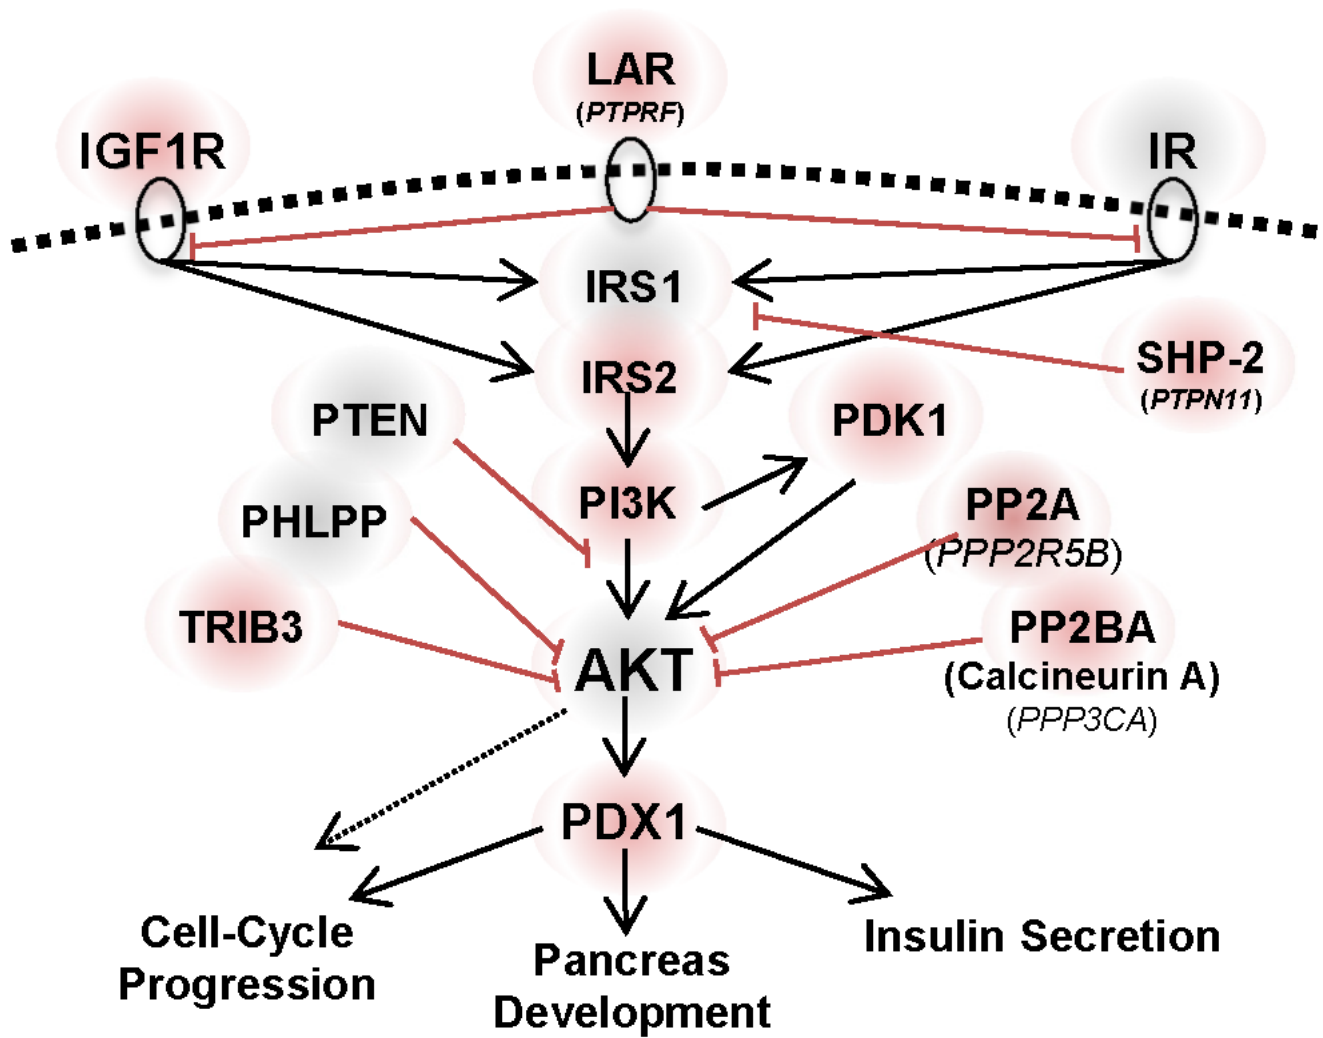

**Fig. S12. Representation of Insulin/IGF1-AKT-PDX1 pathway.** The diagram shows the Insulin/IGF1-AKT-PDX1 signaling pathway based on KEGG and Wikipathway annotations and depicts several m<sup>6</sup>A hypomethylated genes (red shade) and unchanged genes (grey shade) in T2D as compared to Controls.

Fig. S13

## Simple RADAR model with varying sample size

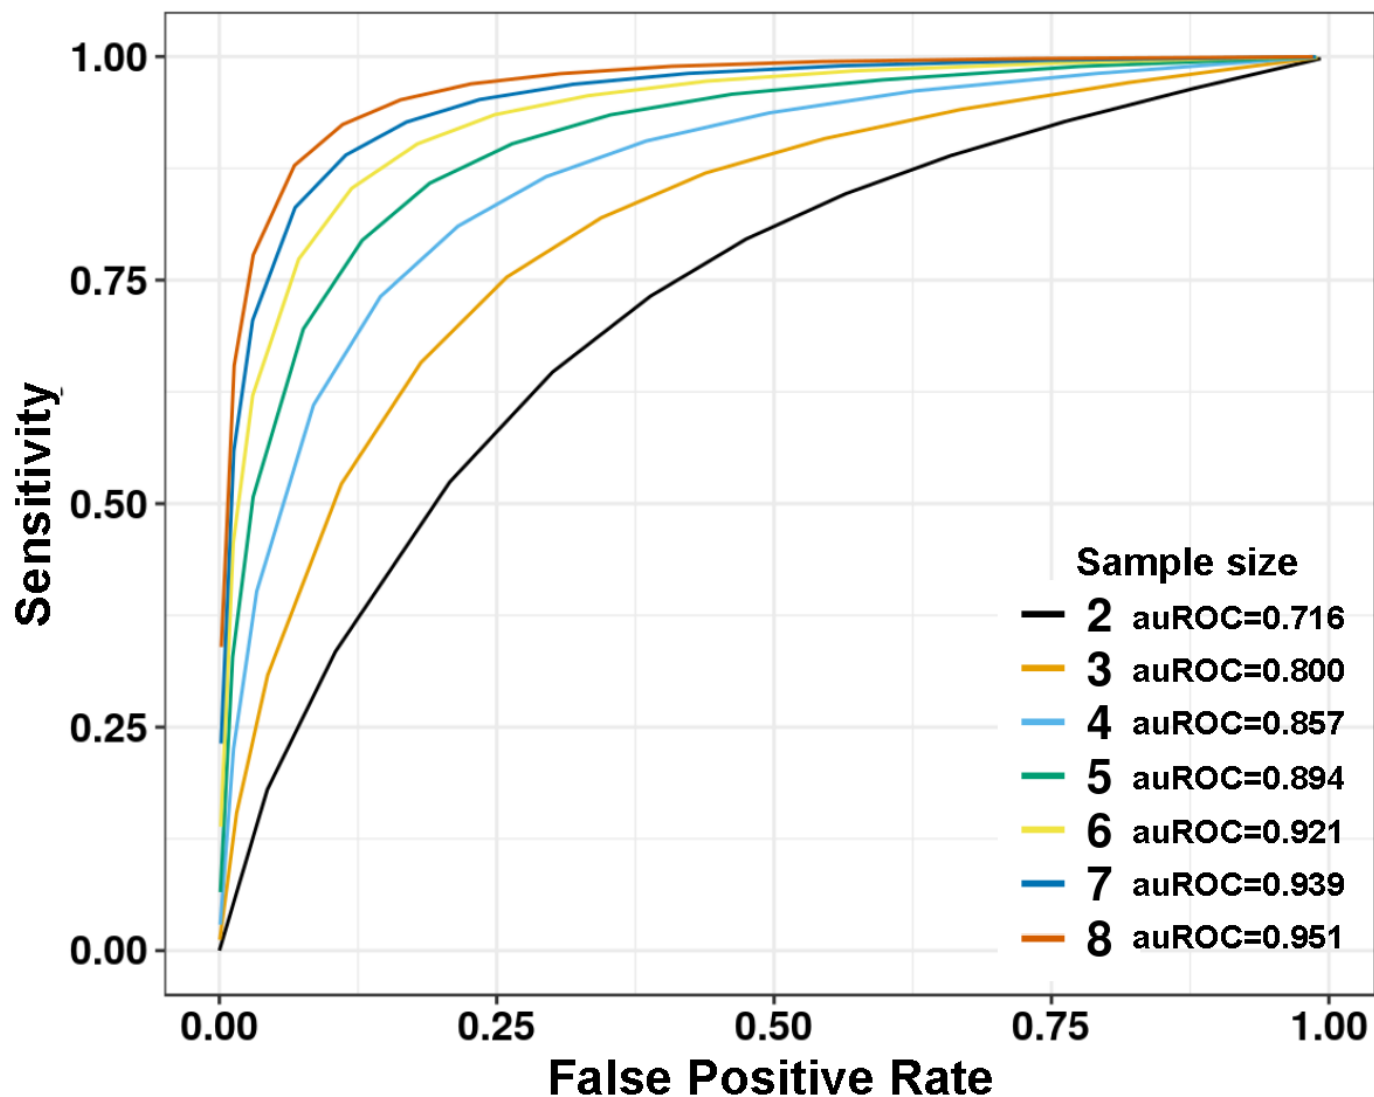

**Fig. S13. Analysis of statistical power and the number of replicates.** We plotted the sensitivity against the empirical FDR by varying the FDR cutoff for selecting predicted differential sites. The larger the area under the curve, the larger the power of the test.

**Table S1**

| Pathway ID | Pathway Names                                       | GeneRatio | BgRatio  | pvalue   | geneID (Entrez)                                                                                                                                                                                                                                                                                                   | Count |
|------------|-----------------------------------------------------|-----------|----------|----------|-------------------------------------------------------------------------------------------------------------------------------------------------------------------------------------------------------------------------------------------------------------------------------------------------------------------|-------|
| hsa04510   | Focal adhesion                                      | 62/1495   | 199/7878 | 2.08E-05 | 3678/3725/2909/1278/9475/2321/29780/10319/7094/3675/3480/3265/55742/7058/3672/5170/2889/10000/3693/394/5595/5500/2534/894/7057/5063/5296/1729/4233/595/1399/5290/2002/858/3910/3918/3915/1292/7422/5156/824/857/896/3694/54776/2932/5602/1284/103910/331/1282/3791/9564/208/2316/5829/2317/3655/5923/6714/81/4659 | 62    |
| hsa04152   | AMPK signaling pathway                              | 41/1495   | 120/7878 | 5.25E-05 | 5526/6794/8408/1978/1080/3480/23417/5564/5170/10000/5528/84335/57521/2308/5209/2309/9586/8660/90993/5296/31/595/5290/3172/6885/10890/32/5518/51094/5529/3630/5862/5520/7248/5214/23411/6720/10488/208/5525/5527                                                                                                   | 41    |
| hsa04928   | Parathyroid hormone synthesis, secretion and action | 37/1495   | 106/7878 | 7.18E-05 | 4325/3727/1958/4324/2260/4041/2770/5595/9368/9586/9138/6256/5144/2768/2771/90993/3710/11214/5567/2353/10672/846/6667/7421/1026/6257/9365/112/107/2767/4040/369/10488/4205/9935/5332/5566                                                                                                                          | 37    |
| hsa04150   | mTOR signaling pathway                              | 48/1495   | 153/7878 | 0.000144 | 6794/1856/8408/54361/1978/3480/3265/58528/7132/529/5170/10000/4041/84335/57521/79109/5595/64798/8321/55004/54541/96459/5296/5290/79726/90423/64121/9681/1857/83667/54468/84219/1975/3630/10325/23175/7248/4040/2932/3551/9470/389541/208/57600/9894/201163/8140/6520                                              | 48    |
| hsa03015   | mRNA surveillance pathway                           | 32/1495   | 91/7878  | 0.000185 | 5526/7919/8106/26528/22985/5528/80335/5500/51585/65109/65110/100529063/23049/8189/9887/79869/53918/5518/5529/10250/5520/10482/140886/8761/5525/23293/5527/22794/1477/53981/10914/2935                                                                                                                             | 32    |



|              |                                                      |         |              |              |                                                                                                                                                                                                                                                                                                                                                                                                                       |    |
|--------------|------------------------------------------------------|---------|--------------|--------------|-----------------------------------------------------------------------------------------------------------------------------------------------------------------------------------------------------------------------------------------------------------------------------------------------------------------------------------------------------------------------------------------------------------------------|----|
| hsa0493<br>3 | AGE-RAGE signaling pathway in diabetic complications | 34/1495 | 100/787<br>8 | 0.00024<br>8 | 3725/1278/1958/3265/10000/4089/4088/2308/5595/7046/113026/183/1027/4790/5970/5296/1729/595/5290/7040/7422/6777/581/5590/5602/5580/5581/1284/1282/7042/208/51196/7056/5332                                                                                                                                                                                                                                             | 34 |
| hsa0406<br>8 | FoxO signaling pathway                               | 42/1495 | 132/787<br>8 | 0.00026<br>2 | 100132074/1387/6794/9455/9454/3480/3265/5564/5170/10000/4089/5934/4088/2308/5595/2309/7046/894/2033/1027/8660/5296/595/6789/5290/4193/7040/1026/3630/23411/1017/5602/3551/4303/1901/1454/7042/369/208/1032/1030/7874                                                                                                                                                                                                  | 42 |
| hsa0453<br>0 | Tight junction                                       | 51/1495 | 170/787<br>8 | 0.00031<br>1 | 776/3725/6794/93643/9475/4771/1080/5962/23370/7122/5564/11346/4628/9368/9414/1740/8189/51421/9075/23327/595/56288/5567/4637/7082/1364/83700/100506658/5518/79784/10096/154796/84952/79778/5590/5520/64398/1365/5602/5581/1741/103910/4214/137075/8976/9223/8777/6714/81/5566/1739                                                                                                                                     | 51 |
| hsa0401<br>0 | MAPK signaling pathway                               | 80/1495 | 295/787<br>8 | 0.00031<br>4 | 3481/775/773/776/3725/6237/1843/3727/4215/6722/2321/9479/2260/3304/2005/3480/3265/1847/7132/8912/9448/100506012/9175/10000/5530/1850/5595/7046/5598/1435/3925/23162/3310/2768/4790/23542/5970/4233/5606/5567/6789/2353/3554/1399/22800/80824/2002/5494/7040/6885/4609/4803/7422/774/3303/5156/3630/7186/5602/781/3551/7042/8605/4137/369/3791/4214/208/3305/2316/51347/4775/7039/9261/2317/23118/9254/5923/57551/5566 | 80 |
| hsa0495<br>0 | Maturity onset diabetes of the young                 | 13/1495 | 26/7878      | 0.00034<br>5 | 3651/389692/4821/6928/3087/6927/3170/3171/3172/3110/3630/168620/222546                                                                                                                                                                                                                                                                                                                                                | 13 |

|          |                                   |         |          |          |                                                                                                                                                                                                                                 |    |
|----------|-----------------------------------|---------|----------|----------|---------------------------------------------------------------------------------------------------------------------------------------------------------------------------------------------------------------------------------|----|
| hsa04071 | Sphingolipid signaling pathway    | 38/1495 | 119/7878 | 0.000466 | 5526/9475/56848/3265/7132/4363/5170/10000/5528/2770/8877/5595/29956/2534/130367/2768/4790/2771/6609/5970/5296/10672/5290/5518/5529/581/5590/5520/7186/9846/5602/1901/5581/259230/208/5525/5527/5332                             | 38 |
| hsa04931 | Insulin resistance                | 35/1495 | 108/7878 | 0.000567 | 7132/5564/5170/10000/51085/2308/5500/22877/8473/5781/9586/183/57761/11000/4790/8660/90993/5970/5296/5290/6945/32/3630/5590/5465/2932/5602/5580/3551/5581/6720/10488/208/5836/4792                                               | 35 |
| hsa04520 | Adherens junction                 | 25/1495 | 72/7878  | 0.001119 | 1387/9855/2260/10163/3480/5777/4089/4088/5595/117178/7046/2534/2033/4233/56288/7082/10580/6885/8826/4008/999/8976/5797/6714/81                                                                                                  | 25 |
| hsa04930 | Type II diabetes mellitus         | 18/1495 | 46/7878  | 0.001147 | 775/773/776/3651/389692/5595/8660/5296/5290/774/3630/5590/5602/5580/80201/3551/5581/122809                                                                                                                                      | 18 |
| hsa04919 | Thyroid hormone signaling pathway | 36/1495 | 119/7878 | 0.001924 | 1387/9862/10231/54361/7067/3265/5170/10000/488/2308/5595/113026/23389/6256/2033/6567/8202/5296/6548/595/5567/5290/4193/4609/6257/4855/9969/5214/2932/5469/208/51196/4853/5332/6714/5566                                         | 36 |
| hsa04390 | Hippo signaling pathway           | 44/1495 | 154/7878 | 0.002303 | 1856/9113/54361/4771/26524/7003/4089/4088/5500/7532/7046/8321/324/894/1740/595/55233/8313/56288/3689/656/23286/1857/7040/4609/7529/4092/5518/154796/8994/896/5590/5520/64398/2932/10413/999/1741/1454/7042/3398/84962/1490/1739 | 44 |
| hsa03040 | Spliceosome                       | 38/1495 | 135/7878 | 0.005799 | 24148/7919/6625/1659/9785/3304/23020/10291/51362/23451/22985/84991/10929/494115/51729/3310/10713/988/10946/6100/9343/3303/343069/1655/9092/5093/4670/8175/10084/100534599/11325/57461/3305/144983/23350/58517                   | 38 |

|              |                                                        |         |              |              |                                                                                                                                                                                                                                                                                                                                                                                                                                                                                 |    |
|--------------|--------------------------------------------------------|---------|--------------|--------------|---------------------------------------------------------------------------------------------------------------------------------------------------------------------------------------------------------------------------------------------------------------------------------------------------------------------------------------------------------------------------------------------------------------------------------------------------------------------------------|----|
|              |                                                        |         |              |              | /9879/26121                                                                                                                                                                                                                                                                                                                                                                                                                                                                     |    |
| hsa0421<br>0 | Apoptosis                                              | 38/1495 | 136/787<br>8 | 0.00661<br>4 | 2021/3725/3265/2081/7132/8837/5170/10000/<br>823/153090/5595/1514/142/4790/3710/5970/5<br>296/2353/8739/5290/1522/6709/4803/824/581/<br>7186/5366/5602/3551/4170/331/143/208/1512/<br>1519/4792/598/8772                                                                                                                                                                                                                                                                        | 38 |
| hsa0406<br>6 | HIF-1<br>signaling<br>pathway                          | 31/1495 | 109/787<br>8 | 0.01022<br>3 | 4055/1387/2321/112399/7037/1978/817/3480/<br>10000/5209/5595/2033/1027/4790/5970/5296/<br>5290/5163/7422/3939/1026/3630/7076/5214/2<br>29/3162/80201/9470/112398/208/54583                                                                                                                                                                                                                                                                                                      | 31 |
| hsa0439<br>2 | Hippo<br>signaling<br>pathway -<br>multiple<br>species | 11/1495 | 29/7878      | 0.01331<br>8 | 8642/9113/4771/26524/7003/55233/23286/899<br>4/10413/1454/84962                                                                                                                                                                                                                                                                                                                                                                                                                 | 11 |
| hsa0402<br>4 | cAMP<br>signaling<br>pathway                           | 54/1495 | 214/787<br>8 | 0.01334<br>7 | 775/776/1387/3725/6237/5443/9475/817/1080/<br>5727/10000/2770/488/5595/5500/9586/2696/1<br>16/2149/2033/5139/5144/4790/2771/90993/59<br>70/5296/6548/1908/5567/2353/2740/5290/228<br>00/6662/6752/84152/112/135/64411/1909/289<br>1/5465/107/5602/10488/2693/208/6751/51196/<br>153/4792/5566/4659                                                                                                                                                                              | 54 |
| hsa0415<br>1 | PI3K-Akt<br>signaling<br>pathway                       | 84/1495 | 354/787<br>8 | 0.01334<br>8 | 3481/5526/3678/6794/1278/2321/2260/1978/3<br>566/10319/3675/3480/3265/3326/2791/118788<br>/7058/3672/5170/10000/5528/3693/5934/5752<br>1/5595/5585/2309/7532/9586/894/1435/54541/<br>6256/2149/7057/1027/4790/90993/9170/5970/<br>5296/4233/595/5290/4193/3910/3918/3915/12<br>92/4609/4803/7422/7529/1026/5518/7184/451<br>5/1975/5529/5156/3630/896/3694/5520/7248/1<br>017/2932/3551/9470/4170/1284/5586/1282/37<br>91/10488/208/5525/9223/5527/2790/7039/232<br>39/598/3655 | 84 |

|              |                                                    |         |              |              |                                                                                                                                                                                                                                     |    |
|--------------|----------------------------------------------------|---------|--------------|--------------|-------------------------------------------------------------------------------------------------------------------------------------------------------------------------------------------------------------------------------------|----|
| hsa0414<br>2 | Lysosome                                           | 33/1495 | 123/787<br>8 | 0.01993<br>4 | 4669/967/1203/8218/3482/4864/3425/1514/95<br>83/8120/2990/6609/23163/10312/1522/6448/7<br>9158/410/2548/8907/8943/256471/55353/8457<br>2/1212/10947/162/8546/1512/3074/1519/2343<br>1/23062                                         | 33 |
| hsa0412<br>0 | Ubiquitin<br>mediated<br>proteolysis               | 36/1495 | 137/787<br>8 | 0.02134<br>9 | 55585/63893/7327/22954/23295/27338/10075/<br>23221/9320/51343/64750/9690/54926/89910/8<br>451/23327/57448/51366/23759/4193/7322/537<br>1/997/9246/7321/65264/8924/331/7326/4214/9<br>2912/11060/55958/4281/9616/51433               | 36 |
| hsa0491<br>0 | Insulin<br>signaling<br>pathway                    | 36/1495 | 137/787<br>8 | 0.02134<br>9 | 1978/3265/5261/5564/5170/2889/10000/57521<br>/2308/5595/5500/8660/5296/31/5567/1399/529<br>0/10580/2002/32/3630/5576/5590/7248/3636/2<br>932/5602/80201/3551/9470/6720/122809/369/<br>208/5836/5566                                 | 36 |
| hsa0431<br>0 | Wnt<br>signaling<br>pathway                        | 41/1495 | 160/787<br>8 | 0.02227<br>9 | 1387/3725/5176/1856/9475/54361/817/59343/<br>1487/4041/5530/4089/4088/6425/8321/324/89<br>4/23002/2033/595/8313/5567/166336/1857/49<br>20/6885/4609/5467/6423/80319/896/27130/40<br>40/2932/5602/1454/8061/85409/4775/5332/55<br>66 | 41 |
| hsa0152<br>2 | Endocrine<br>resistance                            | 27/1495 | 98/7878      | 0.02382<br>7 | 3725/3480/3265/10000/1031/5595/1027/8202/<br>5296/595/5567/2353/5290/4193/6667/1026/48<br>55/112/581/107/5602/369/5469/208/4853/6714<br>/5566                                                                                       | 27 |
| hsa0433<br>0 | Notch<br>signaling<br>pathway                      | 15/1495 | 48/7878      | 0.02833<br>7 | 1387/9612/1856/1487/2033/55534/1840/11387<br>8/1857/4855/5664/6868/9794/151636/4853                                                                                                                                                 | 15 |
| hsa0520<br>2 | Transcriptio<br>nal<br>misregulatio<br>n in cancer | 46/1495 | 186/787<br>8 | 0.02959      | 84444/2321/2005/3480/466/51274/905/5914/1<br>031/2130/6935/2308/4297/1025/6692/8148/89<br>4/3087/6256/1027/4790/221037/5970/9915/42<br>33/4299/4221/4193/5546/904/6667/4609/4094/<br>1026/6257/5371/8938/581/8861/1655/5327/33      | 46 |

|              |                                           |         |              |              |                                                                                                                                                                                                 |    |
|--------------|-------------------------------------------|---------|--------------|--------------|-------------------------------------------------------------------------------------------------------------------------------------------------------------------------------------------------|----|
|              |                                           |         |              |              | 98/3486/648/598/6929                                                                                                                                                                            |    |
| hsa0492<br>7 | Cortisol<br>synthesis<br>and<br>secretion | 19/1495 | 65/7878      | 0.02963<br>7 | 775/776/5443/8912/3777/5151/9586/183/9099<br>3/3710/5567/6667/112/107/2767/949/10488/53<br>32/5566                                                                                              | 19 |
| hsa0437<br>1 | Apelin<br>signaling<br>pathway            | 35/1495 | 137/787<br>8 | 0.0342       | 6237/1958/56848/3265/4899/2791/5564/10000<br>/4089/2770/8877/4088/5595/7046/30849/2771/<br>3710/6548/595/5567/10672/22800/5289/112/6<br>543/107/5327/999/5581/208/1490/4205/2790/5<br>332/5566  | 35 |
| hsa0472<br>2 | Neurotrophin<br>signaling<br>pathway      | 31/1495 | 119/787<br>8 | 0.03468<br>2 | 3725/4215/817/3265/5170/2889/10000/5595/2<br>309/5781/5598/4790/5970/5296/1399/5290/48<br>03/10782/5664/581/25/10818/2932/5602/5580/<br>3551/4214/208/25970/9261/4792                           | 31 |
| hsa0451<br>2 | ECM-<br>receptor<br>interaction           | 24/1495 | 88/7878      | 0.03563<br>6 | 3678/1278/2812/10319/3675/9899/1605/7058/<br>3672/3693/960/9900/7057/3910/3918/3915/12<br>92/6382/255743/3694/1284/1282/375790/3655                                                             | 24 |
| hsa0461<br>1 | Platelet<br>activation                    | 32/1495 | 124/787<br>8 | 0.03647<br>6 | 2909/1278/9475/2812/7094/10000/2770/5595/<br>5500/2534/23365/9138/2149/2771/3710/5296/<br>5567/10672/9002/5290/6786/112/5590/107/57<br>39/103910/8605/208/5332/6714/5566/4659                   | 32 |
| hsa0491<br>5 | Estrogen<br>signaling<br>pathway          | 35/1495 | 138/787<br>8 | 0.03774<br>3 | 3725/5443/3304/3265/3326/2775/10000/5914/<br>2770/5595/9586/3310/2771/90993/3710/8202/<br>5296/5567/2289/2353/5290/6667/7184/3303/1<br>12/107/5580/25984/10488/208/3305/7039/533<br>2/6714/5566 | 35 |
| hsa0465<br>7 | IL-17<br>signaling<br>pathway             | 25/1495 | 93/7878      | 0.03824<br>6 | 3725/3727/3934/3326/5595/5598/9618/4790/2<br>3765/5970/2353/6885/7184/4312/7186/2932/5<br>602/3551/8061/7128/5596/51433/4792/23118/<br>8772                                                     | 25 |
| hsa0541<br>8 | Fluid shear<br>stress and<br>atheroscler  | 35/1495 | 139/787<br>8 | 0.04155<br>8 | 3725/1843/2817/3326/7132/10000/1003/8878/<br>6383/5598/1514/4790/5970/5296/2353/3554/5<br>290/858/6885/7422/6382/7184/857/5590/9446/<br>290/858/6885/7422/6382/7184/857/5590/9446/              | 35 |

|          |                                          |         |          |          |                                                                                                                                                                                                              |    |
|----------|------------------------------------------|---------|----------|----------|--------------------------------------------------------------------------------------------------------------------------------------------------------------------------------------------------------------|----|
|          | osis                                     |         |          |          | 25828/3162/5327/5602/3551/3791/208/4205/7056/6714                                                                                                                                                            |    |
| hsa04012 | ErbB signaling pathway                   | 23/1495 | 85/7878  | 0.042501 | 3725/9542/1978/817/3265/10000/5595/1027/5063/5296/1399/5290/2002/4609/1026/6777/25/2932/5602/369/208/7039/6714                                                                                               | 23 |
| hsa04350 | TGF-beta signaling pathway               | 25/1495 | 94/7878  | 0.043043 | 1387/100532736/1634/4089/4756/4088/5595/64750/7046/2033/7057/4681/7027/656/26585/6667/7040/4609/4092/5518/7042/3398/60436/1030/3625                                                                          | 25 |
| hsa04666 | Fc gamma R-mediated phagocytosis         | 25/1495 | 94/7878  | 0.043043 | 3985/56848/10163/4082/10000/8877/10109/5595/50807/5296/1399/5290/10095/65108/3636/9846/5580/5581/8605/208/8976/4651/81873/55616/1785                                                                         | 25 |
| hsa04668 | TNF signaling pathway                    | 29/1495 | 112/7878 | 0.043098 | 3725/602/7132/8837/10000/153090/5595/3726/9586/1435/3659/6376/4790/90993/5970/5296/5606/2353/5290/6885/7186/5602/3551/10488/208/7128/4792/23118/8772                                                         | 29 |
| hsa05161 | Hepatitis B                              | 40/1495 | 163/7878 | 0.045036 | 1387/3725/3265/10000/4089/4088/5595/7046/9586/2033/4790/148022/90993/5970/5296/5606/2353/5290/2002/7040/6885/4609/7529/1026/6777/581/1017/5602/3551/7042/369/4214/10488/208/4775/353376/4792/23118/6714/8772 | 40 |
| hsa05130 | Pathogenic Escherichia coli infection    | 16/1495 | 55/7878  | 0.045456 | 9475/347733/10381/4691/10109/2534/84617/100506658/10095/7280/81027/25/999/8976/10383/81873                                                                                                                   | 16 |
| hsa04625 | C-type lectin receptor signaling pathway | 27/1495 | 104/7878 | 0.048193 | 3725/6237/602/8915/3265/10000/5530/5595/5781/23365/3659/4790/3710/5970/5296/5290/22800/4193/5602/5580/3551/208/1540/4775/9261/4792/6714                                                                      | 27 |

**Table S1. Enriched DM genes in KEGG pathways in the T2D dataset.** Using the RADAR-detected DM genes in the T2D dataset, we analyzed for enriched KEGG pathways and highlighted a few T2D-related pathways.

**Table S2**

| chr   | start     | end       | name   | score | strand | thickStart | thickEnd  | itemRgb | blockCount | blockSizes | blockStarts | logFC  | p_value   |
|-------|-----------|-----------|--------|-------|--------|------------|-----------|---------|------------|------------|-------------|--------|-----------|
| chr15 | 98648988  | 98649137  | IGF1R  | 0     | +      | 98649038   | 98649087  | 0       | 1          | 149        | 0           | -0.663 | 2.84e-07  |
| chr4  | 15003223  | 15003372  | CPEB2  | 0     | +      | 15003273   | 15003322  | 0       | 1          | 149        | 0           | -1.46  | 1.05e-06  |
| chr17 | 80395488  | 80395637  | RNF213 | 0     | +      | 80395538   | 80395587  | 0       | 1          | 149        | 0           | -1.27  | 2.013e-06 |
| chr8  | 143429196 | 143429395 | MAFA   | 0     | -      | 143429246  | 143429345 | 0       | 1          | 199        | 0           | -0.838 | 5.26e-08  |
| Chr20 | 382532    | 388065    | TRIB3  | 0     | +      | 382532     | 388015    | 0       | 2          | 95,55      | 0,5429      | -0.548 | 2.37e-05  |

**Table S2. Selected DM sites for experimental validation.** The table shows the peak information of selected putative DM site from RADAR analysis. The genome coordinate is based on hg38. The shown peak table was extended 50bp towards both upstream and downstream to search for RRACH motif match because the RNA molecules for m<sup>6</sup>A-seq was fragmented to ~150 nt but our sequence reads were only 50bp. Consequently, the estimated peak locations could have position shift from the real peak for up to 100 bp. The extension was intended to take this uncertainty into account.

**Table S3**

| Name          | Sequence                                                                     |
|---------------|------------------------------------------------------------------------------|
| IGF1R_up      | TAG CCA GTA CCG TAG TGC GTG CGC GAC GCA GTT CGC AAG ATC GCC CCG AAG          |
| IGF1R_down    | /5Phos/CC GGG TCA CAG GCG AGG CCG GCG AGG GGC CAG AGG CTG AGT CGC TGC<br>AT  |
| TRIB3_up      | TAG CCA GTA CCG TAG TGC GTG AGC AAG ATG CAT AAG TAC CAT CCT TGG GAG          |
| TRIB3_down    | /5Phos/CT TAG AAA GCT CCC CAG GTT CGA GGC TGG GCA GAG GCT GAG TCG CTG<br>CAT |
| CPEB2_up      | TAG CCA GTA CCG TAG TGC GTG AGC GGC GGA GGC GGC GGC GGC TTC GAG              |
| CPEB2_down    | /5Phos/CC GGA GGG TGG GGA AGG TGG GGA GGG CTG ACA GAG GCT GAG TCG CTG<br>CAT |
| RNF213_up     | TAG CCA GTA CCG TAG TGC GTG CCT TCT GAG GCA GAG GTG TAA GCG TTT CAG          |
| RNF213_down   | /5Phos/CC CAG ATC GGC TAC AGG GAG TGG CGC TCA GCA GAG GCT GAG TCG CTG<br>CAT |
| MAFA_up       | TAG CCA GTA CCG TAG TGC GTG GGC CTG GTG TCC ACG TCC TGT ACC GCG GAG          |
| MAFA_down     | /5Phos/CC GAG CCG AGG CCC CGA GAG GCC TGC GCG ACA GAG GCT GAG TCG CTG<br>CAT |
| PDX1_up       | TAG CCA GTA CCG TAG TGC GTG CTA ATT GAA TAC AAG GAG GCA AAT TCT AAG          |
| PDX1_down     | /5Phos/CT GAA CAG AAT ACA GAA AAT TCT GAC AGT CCA GAG GCT GAG TCG CTG<br>CAT |
| IGF1R_qPCR_F  | GCC GCT CAT TCA TTT TGA CT                                                   |
| IGF1R_qPCR_R  | CTA GGC GAG GAA AAA CAA GC                                                   |
| TRIB3_qPCR_F  | AAC CTT CAG TGC CTT CCA GA                                                   |
| TRIB3_qPCR_R  | TGT TGT CAG CTC AAG GAT GC                                                   |
| CPEB2_qPCR_F  | TTT CCA CCA AAA GGC TAT GC                                                   |
| CPEB2_qPCR_R  | AGC CCT TAA TGG CCT AGG AA                                                   |
| RNF213_qPCR_F | ACA CCT CTG CCT CAG AAG GA                                                   |
| RNF213_qPCR_R | TGA AGG GGC ATT TTT AGC AC                                                   |
| MAFA_qPCR_F   | GCG GAG AAC GGT GAT TTC TA                                                   |
| MAFA_qPCR_R   | AAG GAA AGG GAG GCT GAG AA                                                   |
| PDX1_qPCR_F   | AGC AGT GCA AGA GTC CCT GT                                                   |
| PDX1_qPCR_R   | CAC AGC CTC TAC CTC GGA AC                                                   |

**Table S3. Oligo probes sequences and qPCR primer sequences. We designed an up and a down**



probe flanking the putative DM m<sup>6</sup>A site leaving the m<sup>6</sup>A nucleotide as a gap. For each pair of oligo probes, we designed an overhanging universal primer sequence at their 5' and 3' end, respectively. The table shows the sequence of oligo probes we used as well as the qPCR primers we used to quantify gene level variation.
